# Supplementary material for: Computer Simulation of Platelet Adhesion around Stent Struts in the Presence and Absence of Tissue Defects around Them
Source: J Interv Cardiol. 2021 Feb 12;2021:8880988. doi: 10.1155/2021/8880988 (PMC7895599; doi:10.1155/2021/8880988)
Supplement: Supplementary Materials — Movies demonstrating the platelet adhesion in the presence and absence of tissue defect. Movie A and movie B demonstrate the platelet adhesion in the absence and presence of tissue defect around stent struts, respectively. The size and direction of each image is the same as Figure 4. [file 8880988.f1.zip]

Archive with 2 entries (2 files):
- movieA.mp4
- movieB.mp4
